# Supplementary material for: Hemilability of phosphine-thioether ligands coordinated to trinuclear Mo3S4 cluster and its effect on hydrogenation catalysis
Source: Royal Society of Chemistry journal article supplement (doi:10.1039/c8nj03720e), 2018-01-01
Supplement: c8nj03720e1.pdf [file c8nj03720e1.pdf]

## SUPPLEMENTARY INFORMATION

# Hemilability of phosphine-thioether ligands coordinated to trinuclear Mo<sub>3</sub>S<sub>4</sub> clusters and its effect on hydrogenation catalysis

*Artem L. Gushchin,<sup>a,b</sup> Nikita Y. Shmelev,<sup>a,b</sup> Svetlana F. Malysheva,<sup>c</sup> Alexander V. Artem'ev,<sup>a</sup> Nataliya A. Belogorlova,<sup>c</sup> Pavel A. Abramov,<sup>a</sup> Nikolay Kompan'kov, Eric Manoury,<sup>d</sup> Rinaldo Poli,<sup>d</sup> Dmitriy G. Sheven,<sup>a</sup> Rosa Llusar,<sup>e</sup> Maxim N. Sokolov,<sup>a,b</sup>*

<sup>a</sup> Nikolaev Institute of Inorganic Chemistry, Siberian Branch of the Russian Academy of Sciences, 3 Lavrentiev av., Novosibirsk, 630090, Russia

<sup>b</sup> Novosibirsk State University, 2 Pirogov str., Novosibirsk, 630090, Russia

<sup>c</sup> Favorsky Irkutsk Institute of Chemistry, Siberian Branch of the Russian Academy of Sciences, 1 Favorsky str., Irkutsk, 664033, Russia

<sup>d</sup> Universite de Toulouse, UPS, INPT, 205, route de Narbonne, Toulouse F-31077, France

<sup>e</sup> Departament de Química Física i Analítica, Universitat Jaume I, Av. Sos Baynat s/n, 12071 Castelló, Spain

### Content

**Figure S1.** Intermolecular  $\pi$ - $\pi$  interactions between Ph rings in the crystal structure of [2]PF<sub>6</sub>·0.6CH<sub>3</sub>CN.

**Figure S2.** CV of [1]PF<sub>6</sub> в CH<sub>3</sub>CN in the range from 0 to -1 V at scan rate of 0.1 V/s.

**Figure S3.** Left: ESI-MS of brown solution after filtration of green [1]PF<sub>6</sub>. Right: Simulated isotopic distribution.

**Figure S4.** <sup>31</sup>P {<sup>1</sup>H} NMR spectra of [3]PF<sub>6</sub>: before adding of Bu<sub>4</sub>NCl (up); after three hours of reaction with Bu<sub>4</sub>NCl (down).

**Figure S5.** ESI-MS of [Mo<sub>3</sub>S<sub>4</sub>Cl<sub>3</sub>(PS)<sub>3</sub>]<sup>+</sup> species after reaction of nitrobenzene reduction.

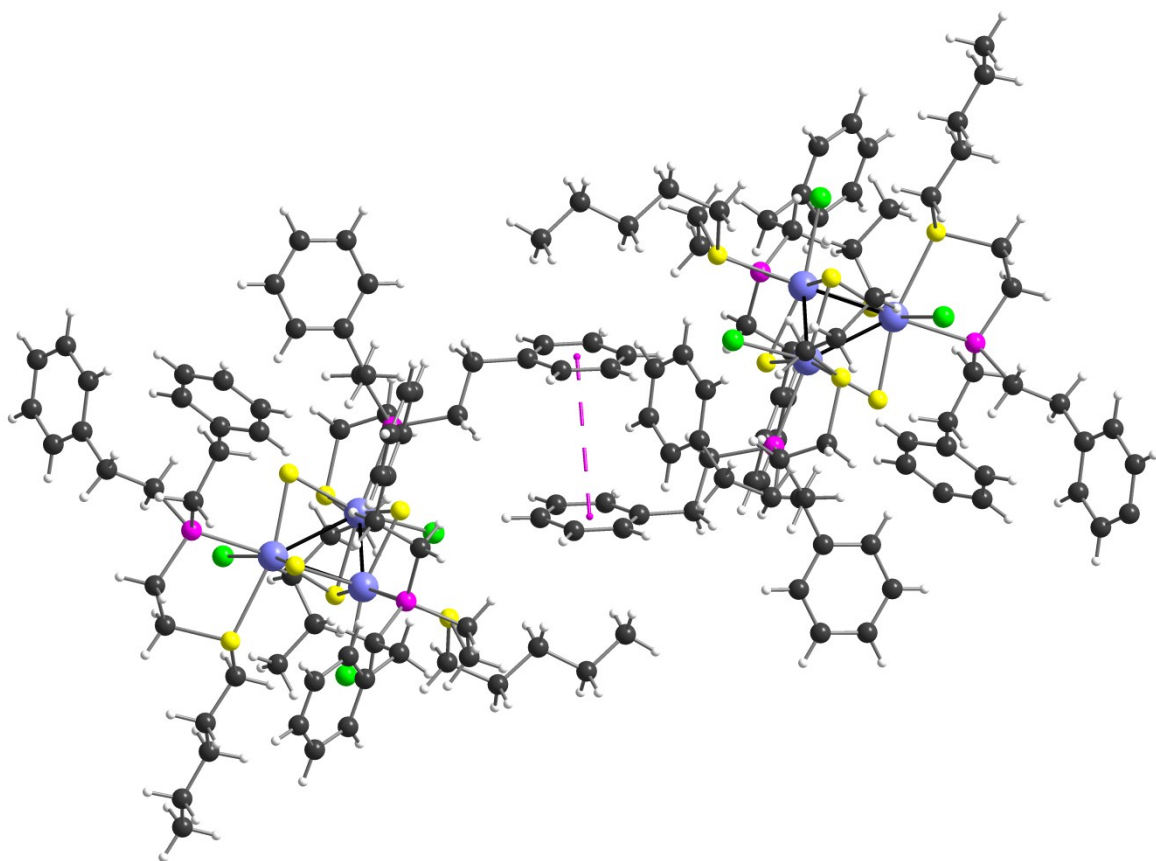

**Figure S1.** Intermolecular  $\pi$ - $\pi$  interactions between Ph rings in the crystal structure of [2]PF<sub>6</sub>·0.6CH<sub>3</sub>CN

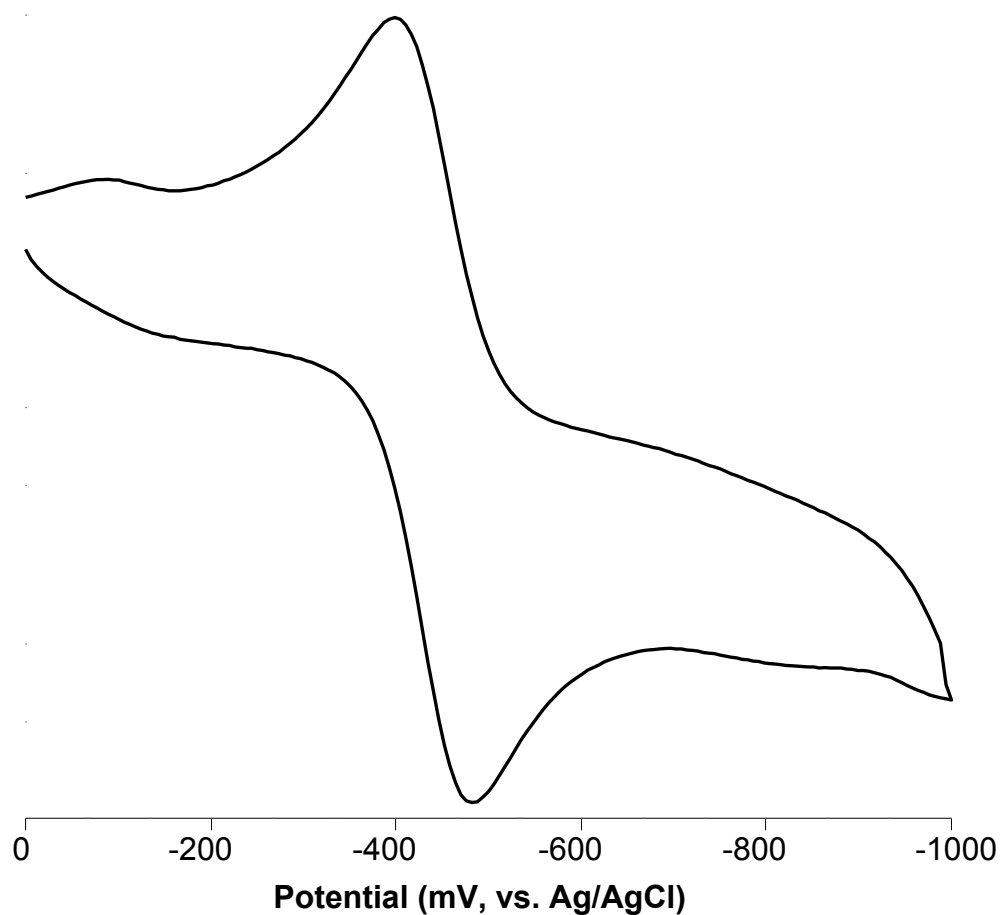

**Figure S2.** CV of [1]PF<sub>6</sub> in CH<sub>3</sub>CN in the range from 0 to -1 V at scan rate of 0.1 V/s

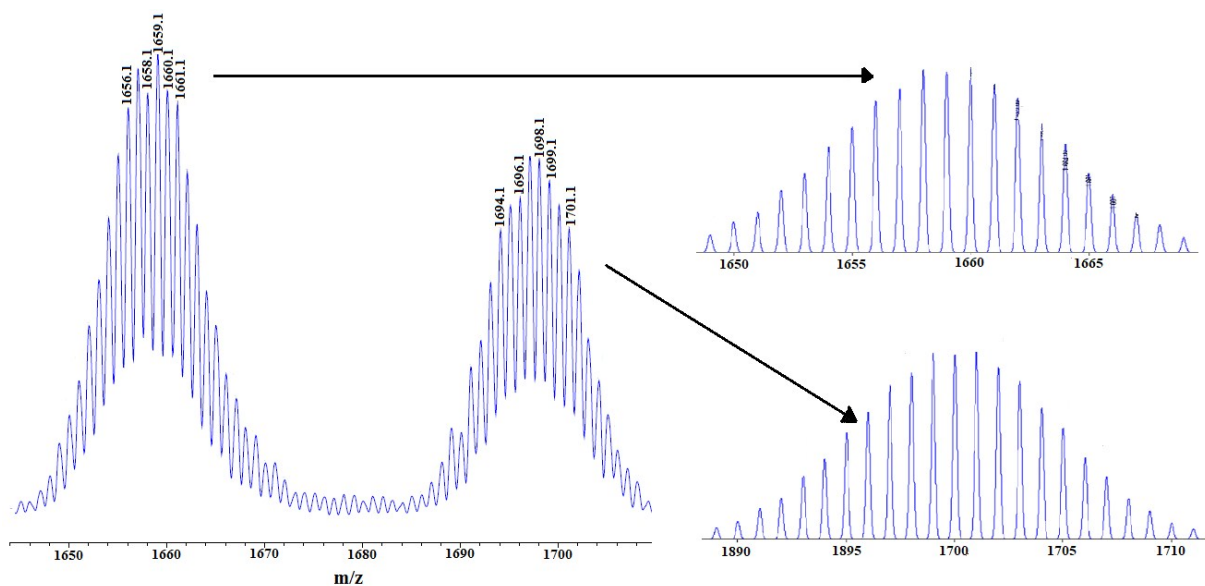

**Figure S3.** *Left:* ESI-MS of brown solution after filtration of green [1]PF<sub>6</sub>. *Right:* Simulated isotopic distribution

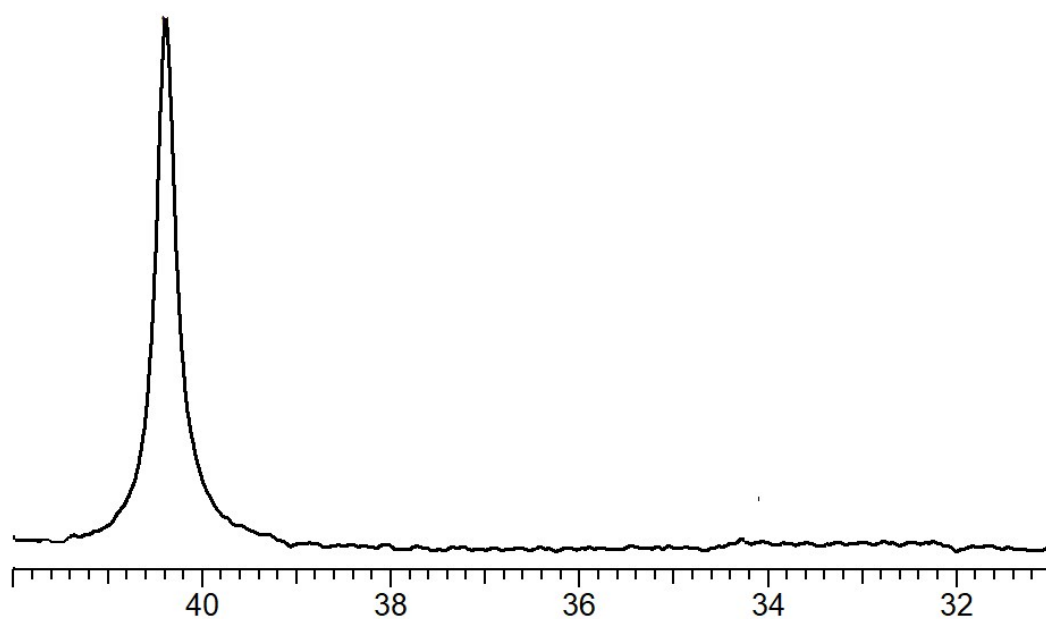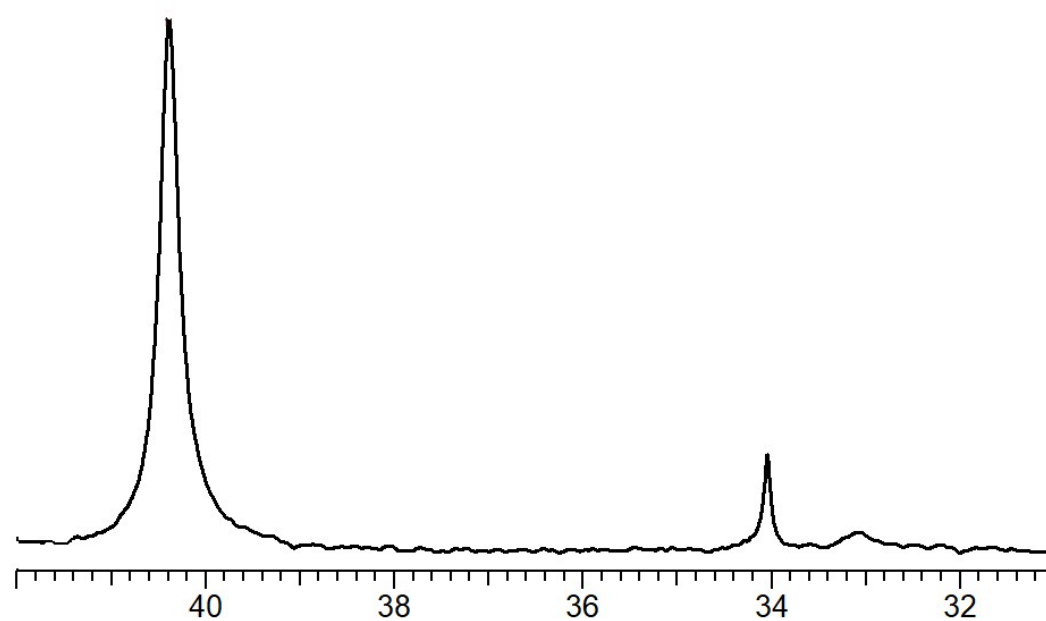

**Figure S4.**  $^{31}\text{P}\{^1\text{H}\}$  NMR spectra of  $[\mathbf{3}]\text{PF}_6^-$ : before adding of  $\text{Bu}_4\text{NCl}$  (up); after three hours of reaction with  $\text{Bu}_4\text{NCl}$  (down)

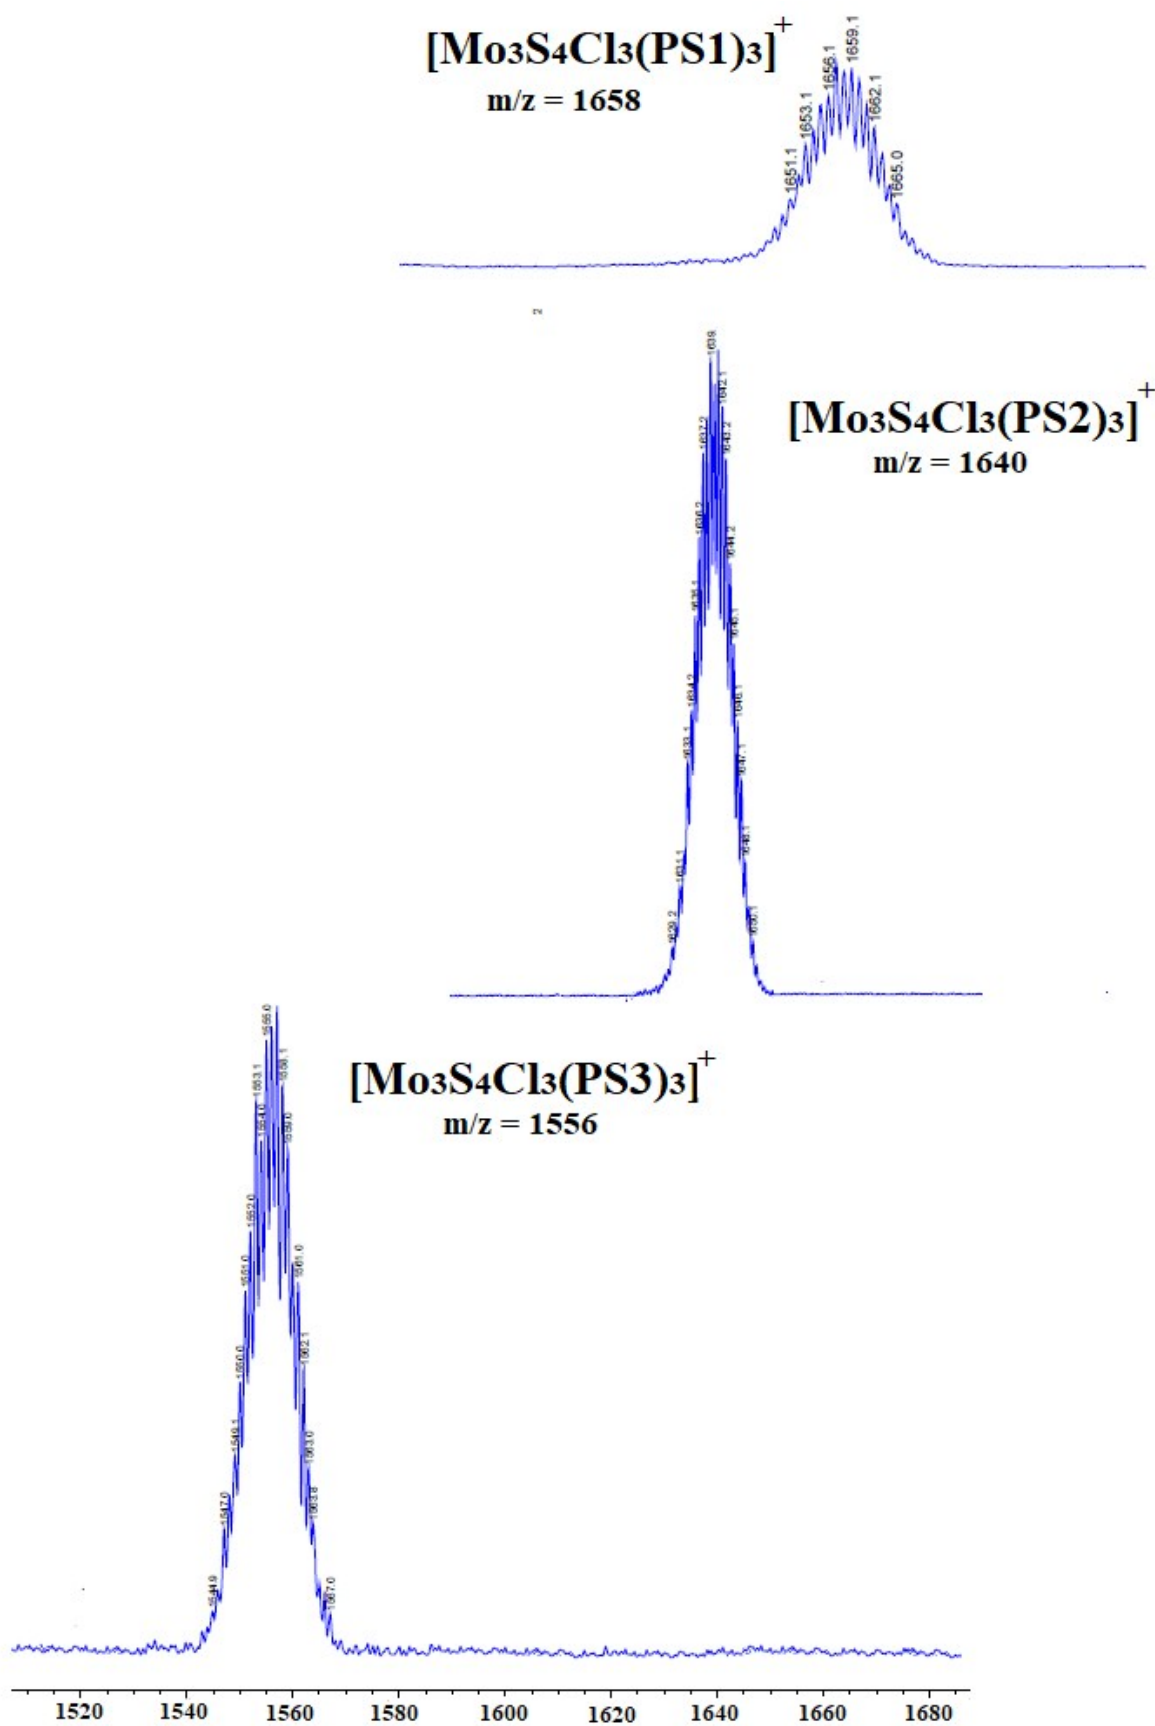

**Figure S5.** ESI-MS of  $[\text{Mo}_3\text{S}_4\text{Cl}_3(\text{PS})_3]^+$  species after reactions of nitrobenzene reduction
